# Supplementary material for: HSF-1 and SIR-2.1 linked insulin-like signaling is involved in goji berry (Lycium spp.) extracts promoting lifespan extension of Caenorhabditis elegans
Source: Royal Society of Chemistry journal article supplement (doi:10.1039/d0fo03300f), 2021-01-01
Supplement: d0fo03300f1.pdf [file d0fo03300f1.pdf]

**Table S1** Primers used for quantitative RT-PCR analysis

| Gene            | Forward primer (5'-3')   | Reverse primer (5'-3')   |
|-----------------|--------------------------|--------------------------|
| <i>β-actin</i>  | TCGGTATGGGACAGAAGGAC     | CATCCCAGTTGGTGACGATA     |
| <i>age-1</i>    | CCTGAACCGACTGCCAATC      | GTGCTTGACGAGATATGTGTATTG |
| <i>daf-16</i>   | TCAAGCCAATGCCACTACC      | TGGAAGAGCCGATGAAGAAG     |
| <i>hsp-16.2</i> | ATGTTGGTGCAGTTGCTTC      | TCTCTTCGACGATTGCCTGT     |
| <i>sir-2.1</i>  | ACTGAGATGCTCCATGACAATAAG | GCAAGACGAACCACACGAAC     |
| <i>sod-2</i>    | CACTCGCTGCCAGATTTA       | ATGGTTCTCCTCCGTCCT       |
| <i>sod-3</i>    | GGCTAAGGATGGTGGAGAAC     | ACAGGTGGCGATCTTCAAG      |
| <i>jnk-1</i>    | TATGCTCCACCTCCACTT       | GGGTTCTTGCGTAATCTG       |
| <i>daf-12</i>   | TGAAACAACACCACCCTACAG    | GCTCAGCGGCATTTCAGTT      |

A)

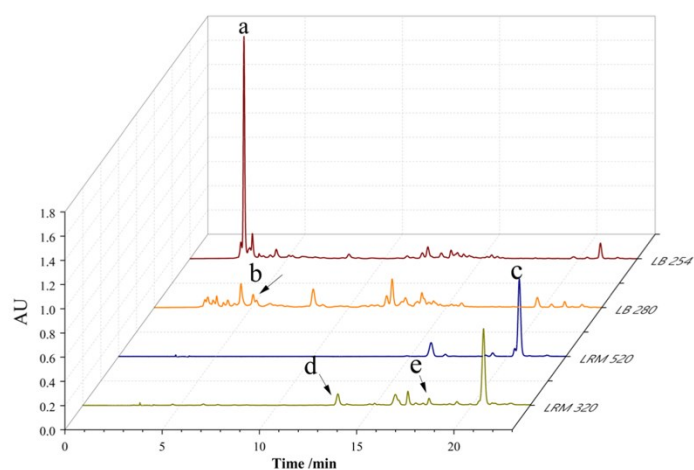

B)

| Goji berry |                                           | Content          |
|------------|-------------------------------------------|------------------|
| LRM        | Total phenolics for LRM (mg GAE/100 g DW) | 3684.02 ± 182.62 |
|            | Total flavonoids for LRM (mg CE/100 g DW) | 3314.84 ± 200.31 |
|            | Pelargonidin (mg/100 g DW)                | 538.02 ± 16.12   |
|            | Delphinidin (mg/100 g DW)                 | 45.10 ± 0.22     |
|            | Chlorogenic acid (mg/100 g DW)            | 70.75 ± 3.58     |
| LB         | Total phenolics for LB (mg GAE/100 g DW)  | 652.06 ± 83.12   |
|            | Total flavonoids for LB (mg CE/100 g DW)  | 740.48 ± 86.68   |
|            | Ascorbic acid (mg/100 g DW)               | 240.87 ± 1.00    |
|            | Gallic acid (mg/100 g DW)                 | 37.63 ± 1.80     |

**Fig. S1** (A) HPLC chromatogram of phenolics in goji berry *Lycium ruthenicum* Murr. (LRM) and *Lycium Barbarum. L* (LB) at four different wavelengths (254, 280, 320, 520): (a) Ascorbic acid; (b) Gallic acid; (c) Pelargonidin; (d) Chlorogenic acid; (e) Delphinidin. (B) Phenolic profiles of LRM and LB (mean ± SD, n = 3).

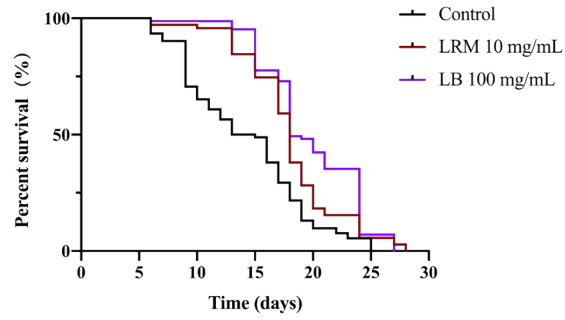

**Fig. S2** Effects of goji berry LRM and LB on the lifespan of *jnk-1(gk7)*.

**Table S2** Effects of LRM and LB on the lifespan of *jnk-1(gk7)* mutants (mean  $\pm$  SD, n = 3)

| Genotype          | Group          | Number | Mean lifespan (days)          | % of control        | Maximum lifespan (days) |
|-------------------|----------------|--------|-------------------------------|---------------------|-------------------------|
| <i>jnk-1(gk7)</i> | Control        | 97     | 15.05 $\pm$ 0.76 <sup>a</sup> | 100.00 <sup>a</sup> | 27                      |
|                   | LRM (10 mg/mL) | 90     | 17.92 $\pm$ 0.34 <sup>a</sup> | 119.05 <sup>a</sup> | 28                      |
|                   | LB (100 mg/mL) | 85     | 19.52 $\pm$ 0.26 <sup>a</sup> | 129.70 <sup>a</sup> | 27                      |

Values with different letters in each column were significantly different ( $p < 0.05$ ).
